# Supplementary material
Source: publisher figshare collection journal article supplement (https://gsajournals.figshare.com/articles/dataset/_/23624268)
Supplement: Supplementary file 1 [file 1]

**Supplementary Data S2 : Supplementary Figures**

**kGWASflow: a modular, flexible and reproducible Snakemake workflow for k-mers based GWAS**

Adnan Kivanc Corut and Jason G. Wallace

**Supplementary Figures**

**Figure S1.** **kGWASflow k-mer count summary statistics from the E. coli ampicillin resistance dataset (Rahman et al. 2018).** (A) Histogram plot showing the distribution of canonical k-mer counts. The x-axis shows the unique k-mer counts and the y-axis shows the number of samples. The legend at the top right shows the total number of unique kmers (canonical). (C) Joint plot showing the relationship between the canonized unique k-mer counts and the number of reads. The x-axis represents the number of unique k-mers (canonical), and the y-axis represents the number of total reads. The red line represents the linear regression line. The r-value is the Pearson correlation coefficient, and the p-value is the two-tailed p-value. The `r` and `p` values are calculated using `personr`. The marginal distributions of the x and y axis are also shown on the top and right sides of the plot, respectively.

**Figure S2. Example outputs obtained from kGWASflow by processing the maize dataset (He et al. 2021)**. **(A)** Bar plot showing the number of k-mers that appeared in exactly `N` number of samples (`N` goes between 1 to the total number of samples). Only the k-mers that passed the initial filtering step were used. **(B)** Histogram plot showing the distribution of non-canonical k-mer counts. The x-axis shows the unique k-mer counts and the y-axis shows the number of samples. The legend at the top right shows the total number of unique k-mers (non-canonical). **(C)** Joint plot showing the relationship between the non-canonical unique k-mer counts and the number of reads. The x-axis represents the number of unique k-mers (non-canonical), and the y-axis represents the number of total reads. The red line represents the linear regression line. The r-value is the Pearson correlation coefficient, and the p-value is the two-tailed p-value. The marginal distributions of the x and y axis are also shown on the top and right sides of the plot, respectively. **(D)** Histogram of the -log10 p-values of each k-mer passed the first kmersGWAS step. The red dashed line indicates the 5% family-wise error-rate threshold. The blue dashed line indicates the 10% family-wise error-rate threshold. Only the p-values of best k-mers from the first kmersGWAS step are used. p-values are obtained from GEMMA during the second step of kmersGWAS. Maize cob color was used as the phenotype. **(E)** Manhattan plot showing -log10 p-values of k-mers that are significantly associated with maize cob color phenotype and their genomic locations. k-mers were mapped to maize B73 reference genome v5.0 using bowtie2.

**Figure S3. kGWASflow k-mer count summary statistics from the maize dataset (He et al. 2021).** **(A)** Histogram plot showing the distribution of canonical k-mer counts. The x-axis shows the unique k-mer counts and the y-axis shows the number of samples. The legend at the top right shows the total number of unique kmers (canonical). **(C)** Joint plot showing the relationship between the canonized unique k-mer counts and the number of reads. The x-axis represents the number of unique k-mers (canonical), and the y-axis represents the number of total reads. The red line represents the linear regression line. The r-value is the Pearson correlation coefficient, and the p-value is the two-tailed p-value. The `r` and `p` values are calculated using `personr`. The marginal distributions of the x and y axis are also shown on the top and right sides of the plot, respectively.

A

B

**Figure S4. (A)** Histogram of the -log10 p-values of each k-mer passed the first kmersGWAS step. The red dashed line indicates the 5% family-wise error-rate threshold. The blue dashed line indicates the 10% family-wise error-rate threshold. Only the p-values of best k-mers from the first kmersGWAS step are used. p-values are obtained from GEMMA during the second step of kmersGWAS. Maize kernel color was used as the phenotype. **(B)** Manhattan plot showing -log10 p-values of k-mers that are significantly associated with maize kernel color phenotype and their genomic locations. k-mers were mapped to maize B73 reference genome v5.0 using bowtie2. Vertical dashed lines indicate chromosome boundaries.

A

B

**Figure S5. (A)** Histogram of the -log10 p-values of each k-mer passed the first kmersGWAS step. The red dashed line indicates the 5% family-wise error-rate threshold. The blue dashed line indicates the 10% family-wise error-rate threshold. Only the p-values of best k-mers from the first kmersGWAS step are used. p-values are obtained from GEMMA during the second step of kmersGWAS. Maize upper-leaf angle was used as the phenotype. **(B)** Manhattan plot showing -log10 p-values of k-mers that are significantly associated with maize upper-leaf angle phenotype and their genomic locations. k-mers were mapped to maize B73 reference genome v5.0 using bowtie2. Vertical dashed lines indicate chromosome boundaries.

**Supplementary Data References**

He, Cheng, Jacob D. Washburn, Yangfan Hao, Zhiwu Zhang, Jinliang Yang, and Sanzhen Liu. 2021. “Trait Association and Prediction Through Integrative K-Mer Analysis.” *BioRxiv*. https://doi.org/10.1101/2021.11.17.468725.

Rahman, Atif, Ingileif Hallgrímsdóttir, Michael Eisen, and Lior Pachter. 2018. “Association Mapping from Sequencing Reads Using K-Mers.” *ELife* 7 (June): e32920.
